# Supplementary material for: What can we learn about urban air quality with regard to the first outbreak of the COVID-19 pandemic? A case study from central Europe
Source: Copernicus journal article supplement (doi:10.5194/acp-20-15725-2020), 2020-12-17
Supplement: Supplementary file 1 [file acp-20-15725-2020-supplement.pdf]

Supplement of Atmos. Chem. Phys., 20, 15725–15742, 2020  
<https://doi.org/10.5194/acp-20-15725-2020-supplement>  
© Author(s) 2020. This work is distributed under  
the Creative Commons Attribution 4.0 License.

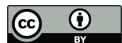

*Supplement of*

**What can we learn about urban air quality with regard to  
the first outbreak of the COVID-19 pandemic?  
A case study from central Europe**

**Imre Salma et al.**

*Correspondence to:* Imre Salma ([salma@chem.elte.hu](mailto:salma@chem.elte.hu))

The copyright of individual parts of the supplement might differ from the CC BY 4.0 License.

**Table S1.** Macrocirculation patterns and their seasonal and annual occurrences in the Carpathian Basin for years 1958–2010 (Maheras et al., 2018).

| No. | Code | Description                                                                      | Occurrence frequency (%) |        |        |        |        |
|-----|------|----------------------------------------------------------------------------------|--------------------------|--------|--------|--------|--------|
|     |      |                                                                                  | Winter                   | Spring | Summer | Autumn | Annual |
| 1   | mCc  | Cyclone with a cold front over northeastern Europe, northerly wind               | 7.3                      | 11.3   | 12.1   | 8.0    | 9.7    |
| 2   | AB   | Anticyclone over the British Isles, northerly wind                               | 5.6                      | 7.1    | 8.6    | 6.4    | 6.9    |
| 3   | CMc  | Mediterranean cyclone with a cold front over southern Europe, northerly wind     | 2.5                      | 3.5    | 1.8    | 1.9    | 2.4    |
| 4   | mCw  | Mediterranean cyclone with a warm front over northeastern Europe, southerly wind | 9.2                      | 9.7    | 5.7    | 7.2    | 7.9    |
| 5   | Ae   | Anticyclone over eastern Europe, southerly wind                                  | 14.2                     | 11.3   | 7.3    | 17.6   | 12.6   |
| 6   | CMw  | Mediterranean cyclone with a warm front over southern Europe, southerly wind     | 8.9                      | 8.7    | 3.7    | 8.3    | 7.4    |
| 7   | zC   | Highly developed cyclone over northern Europe, westerly wind                     | 5.0                      | 3.2    | 2.7    | 2.9    | 3.5    |
| 8   | Aw   | Anticyclone over western Europe, westerly wind                                   | 13.1                     | 11.2   | 20.8   | 12.8   | 14.6   |
| 9   | As   | Anticyclone over southern Europe, westerly wind                                  | 7.0                      | 4.4    | 2.9    | 5.6    | 4.9    |
| 10  | An   | Anticyclone over northern Europe, easterly wind                                  | 10.9                     | 12.8   | 11.3   | 10.1   | 11.3   |
| 11  | AF   | Anticyclone over Fennoscandia, easterly wind                                     | 2.8                      | 5.2    | 5.9    | 3.7    | 4.4    |
| 12  | A    | Anticyclone over the Carpathian Basin, changing wind direction                   | 11.8                     | 7.3    | 13.3   | 13.3   | 11.4   |
| 13  | C    | Cyclone over the Carpathian Basin, changing wind direction                       | 1.7                      | 4.3    | 3.9    | 2.2    | 3.0    |

| Pandemic phase       | Date (dd-MM) | Day of week | Heating info              | MCP code | Precipitation | Pandemic phase     | Date (dd-MM) | Day of week | Heating info                  | MCP code | Precipitation | Pandemic phase        | Date (dd-MM) | Day of week | Heating info                | MCP code | Precipitation |
|----------------------|--------------|-------------|---------------------------|----------|---------------|--------------------|--------------|-------------|-------------------------------|----------|---------------|-----------------------|--------------|-------------|-----------------------------|----------|---------------|
| Pre-emergency (71 d) | 01-01        | Wed         | Heating season (106 days) | 8        | 0             | Restriction (51 d) | 12-03        | Thu         | Non-heating season (107 days) | 7        | 0             | Post-emergency (44 d) | 18-05        | Mon         | Non-heating season (cont'd) | 8        | 0             |
|                      | 02-01        | Thu         |                           | 9        | 0             |                    | 13-03        | Fri         |                               | 7        | 0             |                       | 19-05        | Tue         |                             | 6        | 0             |
|                      | 03-01        | Fri         |                           | 12       | 0             |                    | 14-03        | Sat         |                               | 8        | 0             |                       | 20-05        | Wed         |                             | 1        | 1             |
|                      | 04-01        | Sat         |                           | 1        | 1             |                    | 15-03        | Sun         |                               | 12       | 0             |                       | 21-05        | Thu         |                             | 11       | 0             |
|                      | 05-01        | Sun         |                           | 8        | 0             |                    | 16-03        | Mon         |                               | 5        | 0             |                       | 22-05        | Fri         |                             | 11       | 0             |
|                      | 06-01        | Mon         |                           | 12       | 0             |                    | 17-03        | Tue         |                               | 5        | 0             |                       | 23-05        | Sat         |                             | 4        | 1             |
|                      | 07-01        | Tue         |                           | 12       | 0             |                    | 18-03        | Wed         |                               | 12       | 0             |                       | 24-05        | Sun         |                             | 4        | 0             |
|                      | 08-01        | Wed         |                           | 12       | 0             |                    | 19-03        | Thu         |                               | 12       | 0             |                       | 25-05        | Mon         |                             | 2        | 1             |
|                      | 09-01        | Thu         |                           | 12       | 0             |                    | 20-03        | Fri         |                               | 12       | 0             |                       | 26-05        | Tue         |                             | 2        | 0             |
|                      | 10-01        | Fri         |                           | 9        | 0             |                    | 21-03        | Sat         |                               | 5        | 1             |                       | 27-05        | Wed         |                             | 2        | 3             |
|                      | 11-01        | Sat         |                           | 8        | 0             |                    | 22-03        | Sun         |                               | 2        | 0             |                       | 28-05        | Thu         |                             | 2        | 1             |
|                      | 12-01        | Sun         |                           | 12       | 0             |                    | 23-03        | Mon         |                               | 10       | 1             |                       | 29-05        | Fri         |                             | 11       | 1             |
|                      | 13-01        | Mon         |                           | 12       | 0             |                    | 24-03        | Tue         |                               | 10       | 0             |                       | 30-05        | Sat         |                             | 11       | 1             |
|                      | 14-01        | Tue         |                           | 12       | 0             |                    | 25-03        | Wed         |                               | 10       | 0             |                       | 31-05        | Sun         |                             | 11       | 2             |
|                      | 15-01        | Wed         |                           | 5        | 0             |                    | 26-03        | Thu         |                               | 10       | 0             |                       | 01-06        | Mon         |                             | 11       | 0             |
|                      | 16-01        | Thu         |                           | 5        | 0             |                    | 27-03        | Fri         |                               | 10       | 0             |                       | 02-06        | Tue         |                             | 11       | 0             |
|                      | 17-01        | Fri         |                           | 12       | 0             |                    | 28-03        | Sat         |                               | 5        | 0             |                       | 03-06        | Wed         |                             | 4        | 0             |
|                      | 18-01        | Sat         |                           | 5        | 0             |                    | 29-03        | Sun         |                               | 2        | 0             |                       | 04-06        | Thu         |                             | 1        | 0             |
|                      | 19-01        | Sun         |                           | 2        | 0             |                    | 30-03        | Mon         |                               | 2        | 0             |                       | 05-06        | Fri         |                             | 1        | 5             |
|                      | 20-01        | Mon         |                           | 2        | 0             |                    | 31-03        | Tue         |                               | 2        | 0             |                       | 06-06        | Sat         |                             | 1        | 0             |
|                      | 21-01        | Tue         |                           | 2        | 0             |                    | 01-04        | Wed         |                               | 2        | 0             |                       | 07-06        | Sun         |                             | 1        | 11            |
|                      | 22-01        | Wed         |                           | 2        | 0             |                    | 02-04        | Thu         |                               | 12       | 0             |                       | 08-06        | Mon         |                             | 1        | 0             |
|                      | 23-01        | Thu         |                           | 2        | 0             |                    | 03-04        | Fri         |                               | 12       | 0             |                       | 09-06        | Tue         |                             | 1        | 7             |
|                      | 24-01        | Fri         |                           | 9        | 0             |                    | 04-04        | Sat         |                               | 10       | 0             |                       | 10-06        | Wed         |                             | 13       | 4             |
|                      | 25-01        | Sat         |                           | 9        | 0             |                    | 05-04        | Sun         |                               | 10       | 0             |                       | 11-06        | Thu         |                             | 13       | 0             |
|                      | 26-01        | Sun         |                           | 12       | 0             |                    | 06-04        | Mon         |                               | 5        | 0             |                       | 12-06        | Fri         |                             | 13       | 0             |
|                      | 27-01        | Mon         |                           | 9        | 0             |                    | 07-04        | Tue         |                               | 5        | 0             |                       | 13-06        | Sat         |                             | 4        | 2             |
|                      | 28-01        | Tue         |                           | 1        | 8             |                    | 08-04        | Wed         |                               | 12       | 0             |                       | 14-06        | Sun         |                             | 4        | 24            |
|                      | 29-01        | Wed         |                           | 1        | 1             |                    | 09-04        | Thu         |                               | 12       | 0             |                       | 15-06        | Mon         |                             | 1        | 26            |
|                      | 30-01        | Thu         |                           | 13       | 0             |                    | 10-04        | Fri         |                               | 2        | 0             |                       | 16-06        | Tue         |                             | 4        | 4             |
|                      | 31-01        | Fri         |                           | 4        | 1             |                    | 11-04        | Sat         |                               | 10       | 0             |                       | 17-06        | Wed         |                             | 4        | 13            |
| 01-02                | Sat          | 7           | 1                         | 12-04    | Sun           | 5                  | 0            | 18-06       | Thu                           | 4        | 5             |                       |              |             |                             |          |               |
| 02-02                | Sun          | 7           | 2                         | 13-04    | Mon           | 5                  | 0            | 19-06       | Fri                           | 1        | 0             |                       |              |             |                             |          |               |
| 03-02                | Mon          | 7           | 1                         | 14-04    | Tue           | 1                  | 0            | 20-06       | Sat                           | 8        | 0             |                       |              |             |                             |          |               |
| 04-02                | Tue          | 13          | 6                         | 15-04    | Wed           | 2                  | 0            | 21-06       | Sun                           | 8        | 1             |                       |              |             |                             |          |               |
| 05-02                | Wed          | 6           | 0                         | 16-04    | Thu           | 9                  | 0            | 22-06       | Mon                           | 8        | 0             |                       |              |             |                             |          |               |
| 06-02                | Thu          | 2           | 0                         | 17-04    | Fri           | 9                  | 0            | 23-06       | Tue                           | 8        | 0             |                       |              |             |                             |          |               |
| 07-02                | Fri          | 10          | 0                         | 18-04    | Sat           | 11                 | 0            | 24-06       | Wed                           | 11       | 0             |                       |              |             |                             |          |               |
| 08-02                | Sat          | 12          | 0                         | 19-04    | Sun           | 13                 | 0            | 25-06       | Thu                           | 11       | 0             |                       |              |             |                             |          |               |
| 09-02                | Sun          | 9           | 0                         | 20-04    | Mon           | 11                 | 0            | 26-06       | Fri                           | 10       | 1             |                       |              |             |                             |          |               |
| 10-02                | Mon          | 1           | 5                         | 21-04    | Tue           | 11                 | 0            | 27-06       | Sat                           | 5        | 0             |                       |              |             |                             |          |               |
| 11-02                | Tue          | 13          | 0                         | 22-04    | Wed           | 11                 | 0            | 28-06       | Sun                           | 12       | 0             |                       |              |             |                             |          |               |
| 12-02                | Wed          | 8           | 0                         | 23-04    | Thu           | 11                 | 0            | 29-06       | Mon                           | 1        | 6             |                       |              |             |                             |          |               |
| 13-02                | Thu          | 9           | 2                         | 24-04    | Fri           | 12                 | 0            | 30-06       | Tue                           | 8        | 0             |                       |              |             |                             |          |               |
| 14-02                | Fri          | 1           | 0                         | 25-04    | Sat           | 1                  | 0            | 01-07       | Wed                           | 9        | 0             |                       |              |             |                             |          |               |
| 15-02                | Sat          | 12          | 0                         | 26-04    | Sun           | 1                  | 0            | 02-07       | Thu                           | 1        | 2             |                       |              |             |                             |          |               |
| 16-02                | Sun          | 5           | 0                         | 27-04    | Mon           | 1                  | 0            | 03-07       | Fri                           | 1        | 0             |                       |              |             |                             |          |               |
| 17-02                | Mon          | 5           | 0                         | 28-04    | Tue           | 1                  | 0            | 04-07       | Sat                           | 8        | 0             |                       |              |             |                             |          |               |
| 18-02                | Tue          | 7           | 0                         | 29-04    | Wed           | 1                  | 3            | 05-07       | Sun                           | 8        | 0             |                       |              |             |                             |          |               |
| 19-02                | Wed          | 4           | 1                         | 30-04    | Thu           | 4                  | 4            | 06-07       | Mon                           | 8        | 7             |                       |              |             |                             |          |               |
| 20-02                | Thu          | 4           | 0                         | 01-05    | Fri           | 1                  | 1            | 07-07       | Tue                           | 8        | 0             |                       |              |             |                             |          |               |
| 21-02                | Fri          | 5           | 0                         | 02-05    | Sat           | 1                  | 0            | 08-07       | Wed                           | 8        | 0             |                       |              |             |                             |          |               |
| 22-02                | Sat          | 8           | 0                         | 03-05    | Sun           | 1                  | 0            | 09-07       | Thu                           | 12       | 0             |                       |              |             |                             |          |               |
| 23-02                | Sun          | 7           | 0                         | 04-05    | Mon           | 4                  | 0            | 10-07       | Fri                           | 12       | 0             |                       |              |             |                             |          |               |
| 24-02                | Mon          | 1           | 0                         | 05-05    | Tue           | 13                 | 0            | 11-07       | Sat                           | 1        | 7             |                       |              |             |                             |          |               |
| 25-02                | Tue          | 4           | 2                         | 06-05    | Wed           | 1                  | 0            | 12-07       | Sun                           | 8        | 0             |                       |              |             |                             |          |               |
| 26-02                | Wed          | 1           | 6                         | 07-05    | Thu           | 2                  | 0            | 13-07       | Mon                           | 8        | 0             |                       |              |             |                             |          |               |
| 27-02                | Thu          | 1           | 1                         | 08-05    | Fri           | 12                 | 0            | 14-07       | Tue                           | 12       | 0             |                       |              |             |                             |          |               |
| 28-02                | Fri          | 13          | 2                         | 09-05    | Sat           | 9                  | 0            | 15-07       | Wed                           | 12       | 0             |                       |              |             |                             |          |               |
| 29-02                | Sat          | 9           | 0                         | 10-05    | Sun           | 1                  | 0            | 16-07       | Thu                           | 1        | 0             |                       |              |             |                             |          |               |
| 01-03                | Sun          | 1           | 17                        | 11-05    | Mon           | 6                  | 0            | 17-07       | Fri                           | 1        | 2             |                       |              |             |                             |          |               |
| 02-03                | Mon          | 13          | 2                         | 12-05    | Tue           | 1                  | 1            | 18-07       | Sat                           | 1        | 1             |                       |              |             |                             |          |               |
| 03-03                | Tue          | 13          | 4                         | 13-05    | Wed           | 1                  | 0            | 19-07       | Sun                           | 10       | 7             |                       |              |             |                             |          |               |
| 04-03                | Wed          | 13          | 0                         | 14-05    | Thu           | 13                 | 0            | 20-07       | Mon                           | 1        | 0             |                       |              |             |                             |          |               |
| 05-03                | Thu          | 12          | 2                         | 15-05    | Fri           | 13                 | 0            | 21-07       | Tue                           | 1        | 1             |                       |              |             |                             |          |               |
| 06-03                | Fri          | 13          | 11                        | 16-05    | Sat           | 2                  | 2            | 22-07       | Wed                           | 1        | 0             |                       |              |             |                             |          |               |
| 07-03                | Sat          | 13          | 0                         | 17-05    | Sun           | 2                  | 3            | 23-07       | Thu                           | 1        | 1             |                       |              |             |                             |          |               |
| 08-03                | Sun          | 8           | 0                         |          |               |                    |              | 24-07       | Fri                           | 10       | 17            |                       |              |             |                             |          |               |
| 09-03                | Mon          | 6           | 0                         |          |               |                    |              | 25-07       | Sat                           | 13       | 0             |                       |              |             |                             |          |               |
| 10-03                | Tue          | 6           | 1                         |          |               |                    |              | 26-07       | Sun                           | 1        | 2             |                       |              |             |                             |          |               |
| 11-03                | Wed          | 7           | 0                         |          |               |                    |              | 27-07       | Mon                           | 1        | 0             |                       |              |             |                             |          |               |
|                      |              |             |                           |          |               |                    |              | 28-07       | Tue                           | 1        | 0             |                       |              |             |                             |          |               |
|                      |              |             |                           |          |               |                    |              | 29-07       | Wed                           | 1        | 0             |                       |              |             |                             |          |               |
|                      |              |             |                           |          |               |                    |              | 30-07       | Thu                           | 8        | 0             |                       |              |             |                             |          |               |
|                      |              |             |                           |          |               |                    |              | 31-07       | Fri                           | 12       | 0             |                       |              |             |                             |          |               |

Total number of days: 213

**Figure S1.** Survey on time intervals of interest with basic facts, daily macrocirculation pattern (MCP) codes and daily precipitation sum (mm) in Budapest from 1 January to 31 July 2020. The holidays are indicated in darker green, heating season in darker grey, non-heating season in lighter grey, Pre-emergency phase of the first COVID-19 outbreak in lighter blue, Pre-restriction phase in lighter yellow, Restriction phase in orange, Post-restriction phase in darker yellow and Post-emergency phase in darker blue colours. The cyclonic and anticyclonic MCP types are marked in lighter green and pink colours, respectively.

Motor vehicles road traffic was measured by the Budapest Public Roads Ltd., which is responsible for operation, control and maintenance of all roads, streets, bridges, tunnels, other structures and traffic engineering facilities in Budapest. The actual locations were 1) Szabadság Bridge, 2) Váci Road near its junction with Árpád Road, 3) Alkotás Road near its junction with Nagyenyed Street, 4) Margit Boulevard and Vérmező Street which both lead to Széna Square (and, therefore, this site is called here as Széna Square), where the air quality monitoring station is also located.

The Szabadság Bridge hosts quite complex events. The bridge was reserved for the pedestrians and was closed for motor vehicles on some summer weekends, namely on 17–18 June, 24–25 June, 5–6 August and 12–13 August in 2017, on 14–15 July, 21–22 July, 28–29 July and 4–5 August in 2018, on 6–7 July, 13–14 July, 20–21 July and 27–28 July on 2019. It was also partially or completely closed for vehicles in some other intervals due to urban running races or for its planned extended cleaning. The vehicle census data for these days and time intervals were included in deriving the time series of vehicular traffic but were excluded when calculating the average diurnal patterns and descriptive statistics to avoid their distortion due to these very specific or unusual circumstances.

For location no. 3 (Alkotás Road), the data coverage for year 2019 was poor (21 %) and, therefore, this year was excluded from the averaging for the reference year. Similarly, there were larger scale traffic control arrangements and missing data in larger abundance for the site no. 4 (Széna Square), and, therefore, year 2019 was only maintained here.

**Table S2.** Ranges and medians of hourly mean  $T$  ( $^{\circ}\text{C}$ ), RH (%), absolute humidity (AH, in  $\text{g m}^{-3}$ ), WS ( $\text{m s}^{-1}$ ), GRad ( $\text{W m}^{-2}$ , for individual data  $\geq 50 \text{ W m}^{-2}$ ), daily maximum planetary boundary layer height (PBLH<sub>max</sub>, in km) in the average reference year of 2017–2019 (Y3Ref) and year 2020 (Y2020) together with their relative difference (RDiff) in % and their anomaly standardised to SD (SAly) for the overall state of emergency time interval (from 12 March to 17 June).

| Interval/<br>Variable | Y3Ref |        |     | Y2020 |        |     | RDiff             | SAly            |
|-----------------------|-------|--------|-----|-------|--------|-----|-------------------|-----------------|
|                       | Min   | Median | Max | Min   | Median | Max |                   |                 |
| $T$                   | 3.2   | 16     | 30  | -0.4  | 15     | 31  | -0.7 <sup>†</sup> | -0.1            |
| RH                    | 19    | 56     | 92  | 12    | 50     | 100 | -11               | -0.4            |
| AH                    | 2.8   | 7.6    | 17  | 1.2   | 5.9    | 17  | -22               | -0.5            |
| WS                    | 0.3   | 1.7    | 7.0 | 0.2   | 1.6    | 6.5 | -6                | -0.1            |
| GRad                  | 51    | 408    | 913 | 50    | 405    | 977 | -1                | -3 <sup>‡</sup> |
| PBLH <sub>max</sub>   | 0.84  | 1.5    | 2.2 | 0.57  | 1.7    | 3.3 | +10               | +0.3            |

<sup>†</sup> Y2020–Y3Ref difference in median  $T$ s; in a unit of  $^{\circ}\text{C}$ .

<sup>‡</sup> Anomaly not standardised to SD; in a unit of  $\text{W m}^{-2}$ .

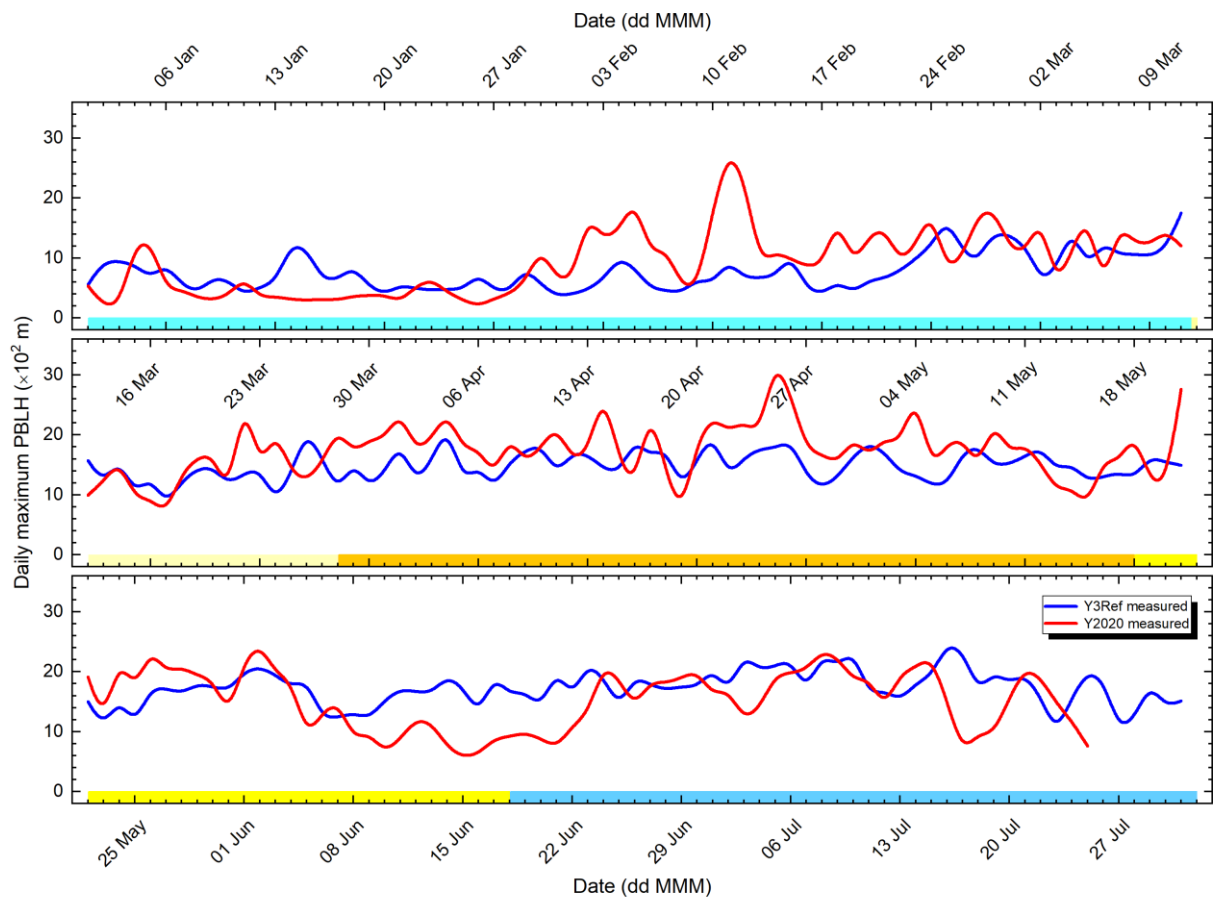

**Figure S2.** Time series of the daily maximum of planetary boundary layer height ( $PBLH_{max}$ ) in the average reference year of 2017–2019 (Y3Ref) and year 2020 over the five consecutive phases of the first COVID-19 outbreak. The phases are marked by the following colour codes: Pre-emergency phase lighter blue, Pre-restriction phase lighter yellow, Restriction phase orange, Post-restriction phase darker yellow and Post-emergency phase darker blue.

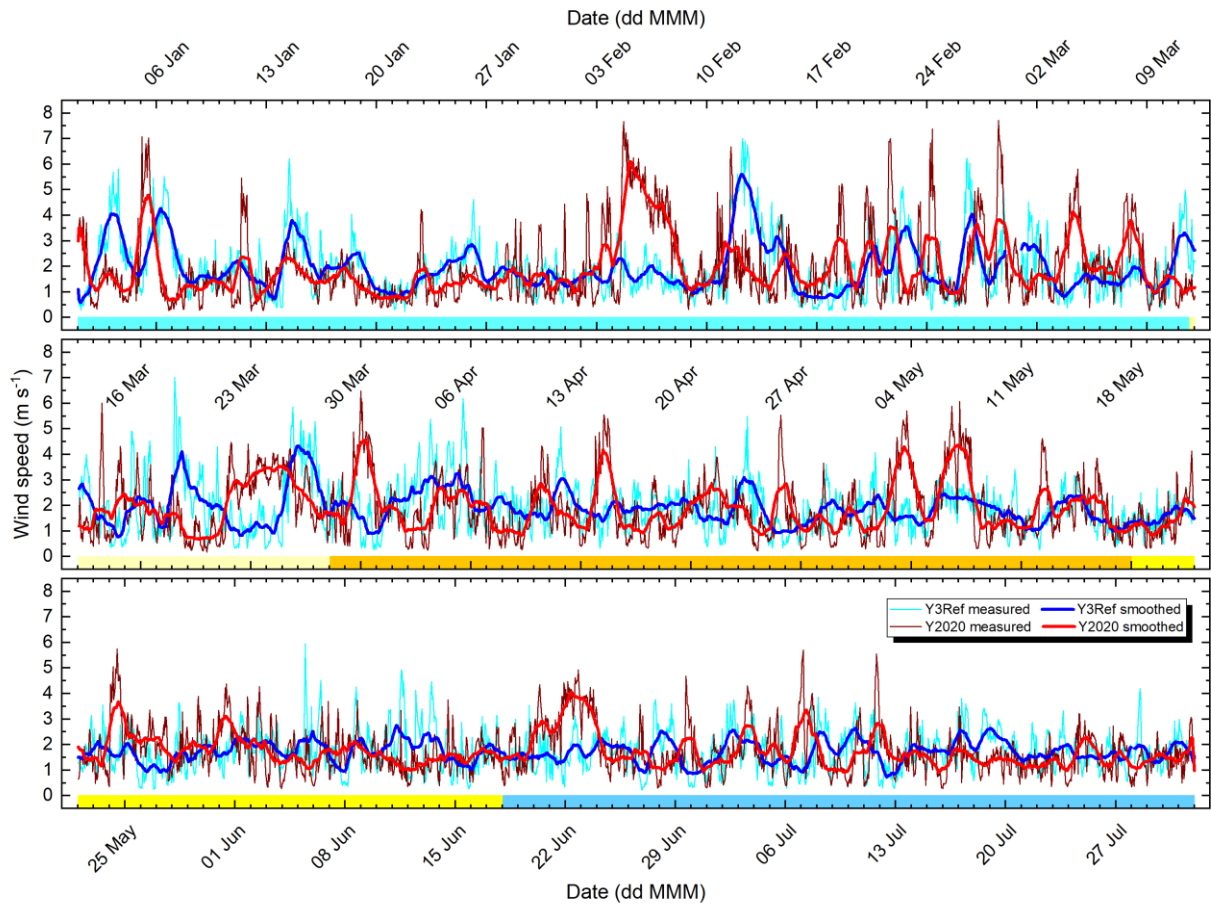

**Figure S3.** Time series of wind speed in the average reference year of 2017–2019 (Y3Ref) and year 2020 together with their 24-h smoothed curves over the five consecutive phases of the first COVID-19 outbreak. The phases are marked by the following colour codes: Pre-emergency phase lighter blue, Pre-restriction phase lighter yellow, Restriction phase orange, Post-restriction phase darker yellow and Post-emergency phase darker blue. The tick labels of the abscissa indicate the Mondays in 2020.

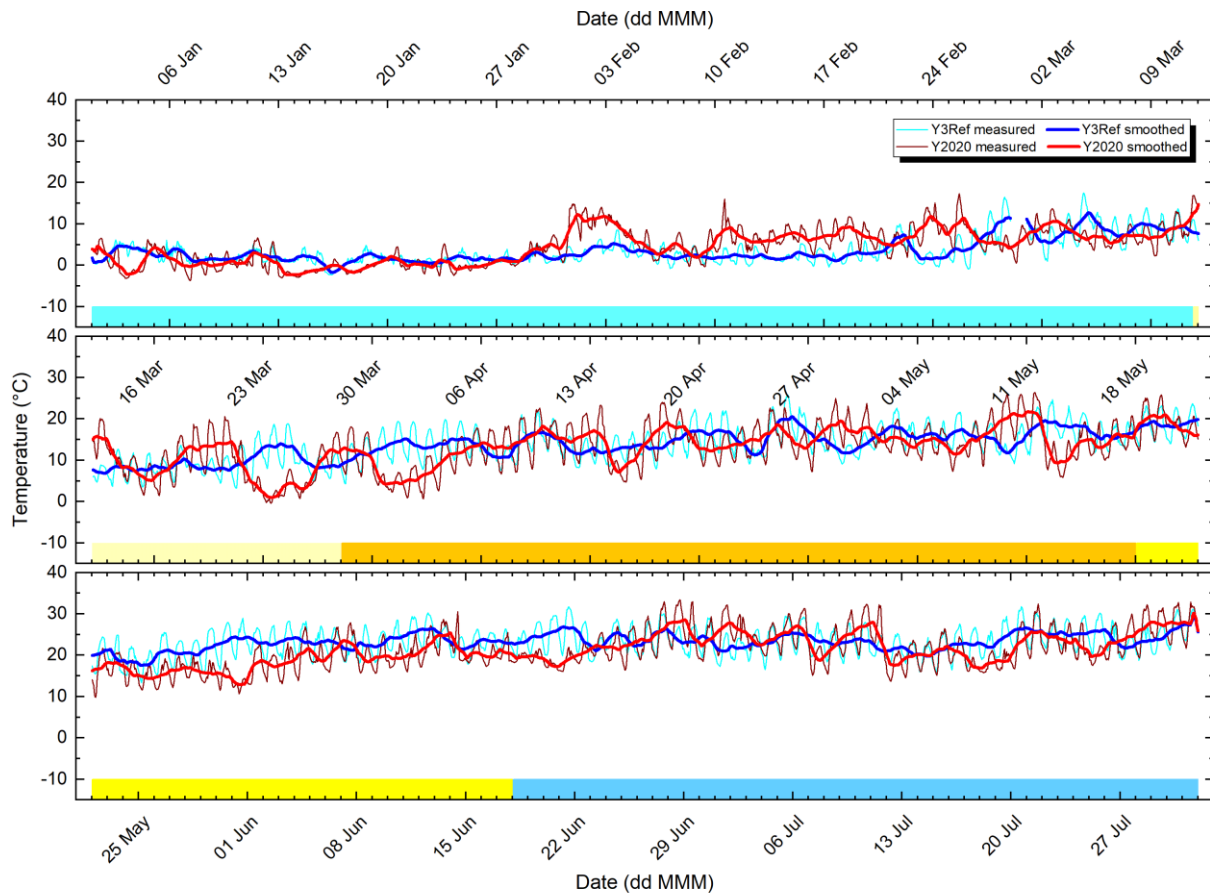

**Figure S4.** Time series of air temperature in the average reference year of 2017–2019 (Y3Ref) and year 2020 together with their 24-h smoothed curves over the five consecutive phases of the first COVID-19 outbreak. The phases are marked by the following colour codes: Pre-emergency phase lighter blue, Pre-restriction phase lighter yellow, Restriction phase orange, Post-restriction phase darker yellow and Post-emergency phase darker blue. The tick labels of the abscissa indicate the Mondays in 2020.



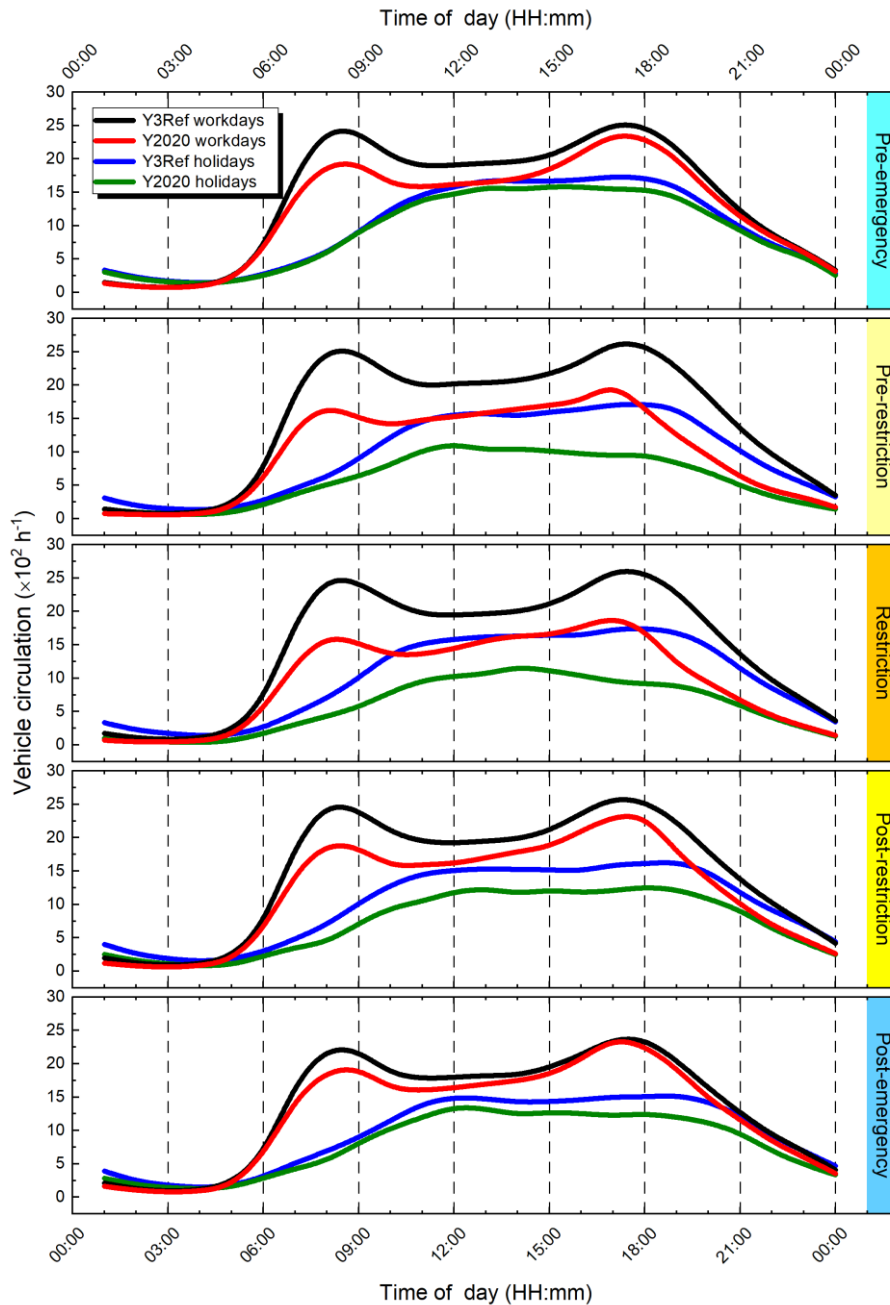

**Figure S5.** Average diurnal variations of motor vehicle road traffic in both directions on a major route (Váci Road) in Budapest separately for workdays and holidays in the average reference year of 2017–2019 (Y3Ref) and year 2020 over the five consecutive phases of the first COVID-19 outbreak. The phases are marked by the following colour codes: Pre-emergency phase lighter blue, Pre-restriction phase lighter yellow, Restriction phase orange, Post-restriction phase darker yellow and Post-emergency phase darker blue.

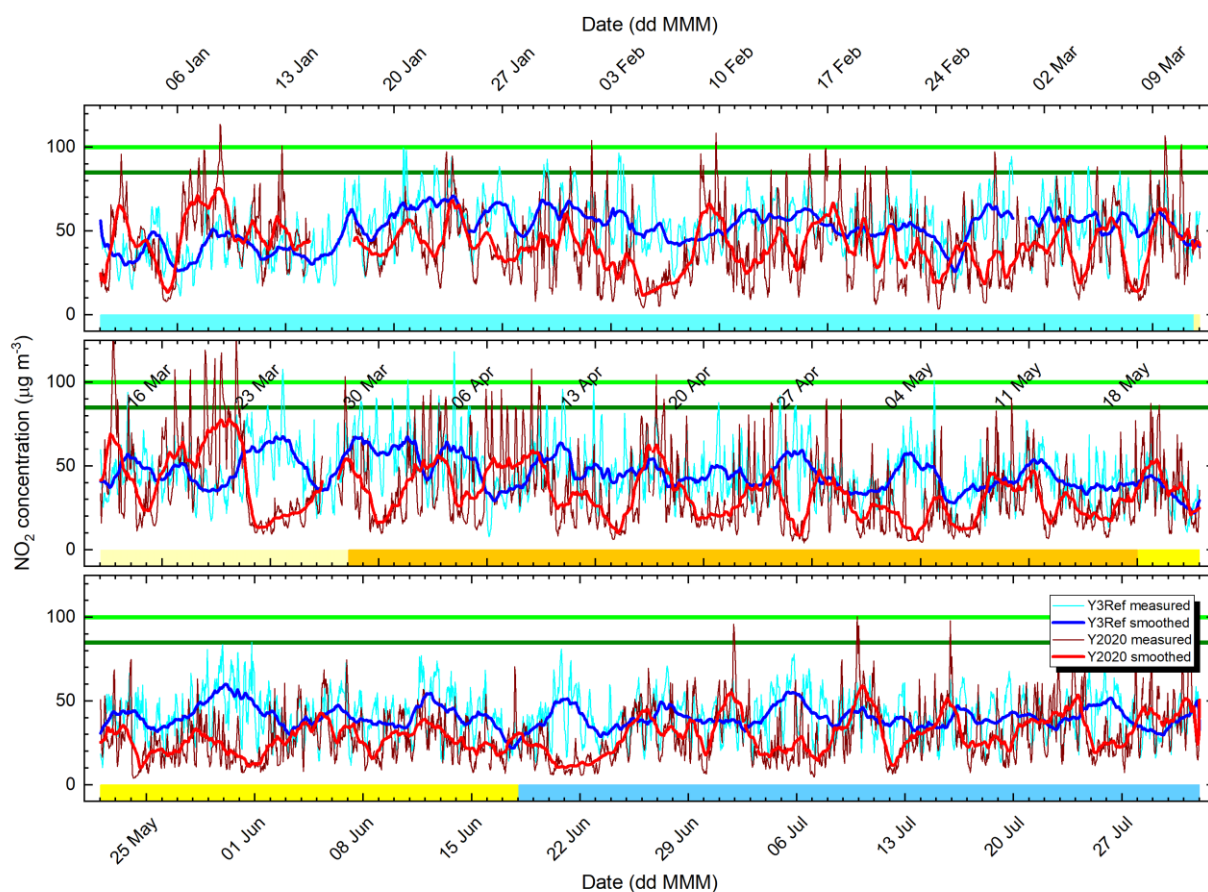

**Figure S6.** Time series of NO<sub>2</sub> concentration in the average reference year of 2017–2019 (Y3Ref) and year 2020 together with their 24-h smoothed curves over the five consecutive phases of the first COVID-19 outbreak. The phases are marked by the following colour codes: Pre-emergency phase lighter blue, Pre-restriction phase lighter yellow, Restriction phase orange, Post-restriction phase darker yellow and Post-emergency phase darker blue. The 1-h and daily health limits of 100 and 85  $\mu\text{g m}^{-3}$  are indicated by horizontal lines in lighter green and darker green colours, respectively. The tick labels of the abscissa indicate the Mondays in 2020.

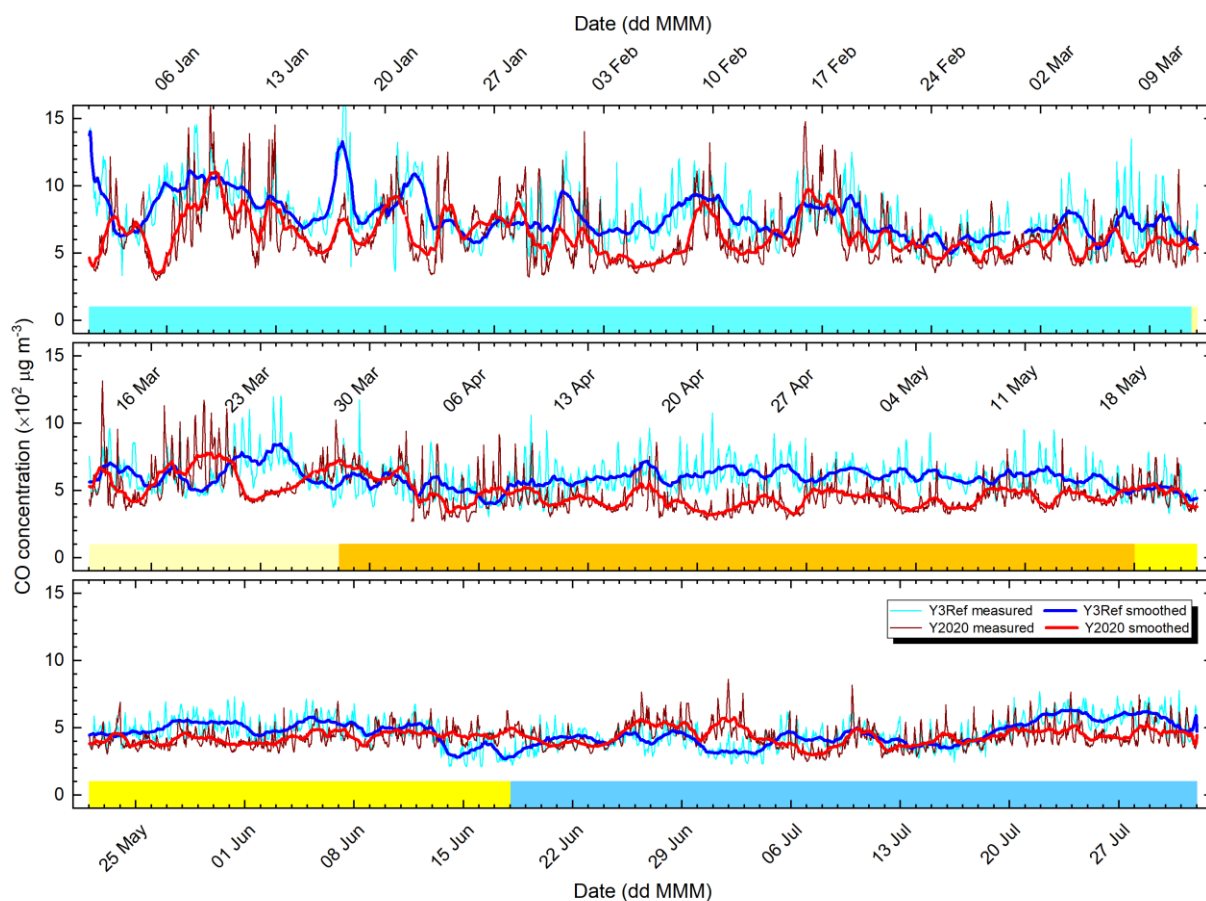

**Figure S7.** Time series of CO concentration in the average reference year of 2017–2019 (Y3Ref) and year 2020 together with their 24-h smoothed curves over the five consecutive phases of the first COVID-19 outbreak. The phases are marked by the following colour codes: Pre-emergency phase lighter blue, Pre-restriction phase lighter yellow, Restriction phase orange, Post-restriction phase darker yellow and Post-emergency phase darker blue. The tick labels of the abscissa indicate the Mondays in 2020.

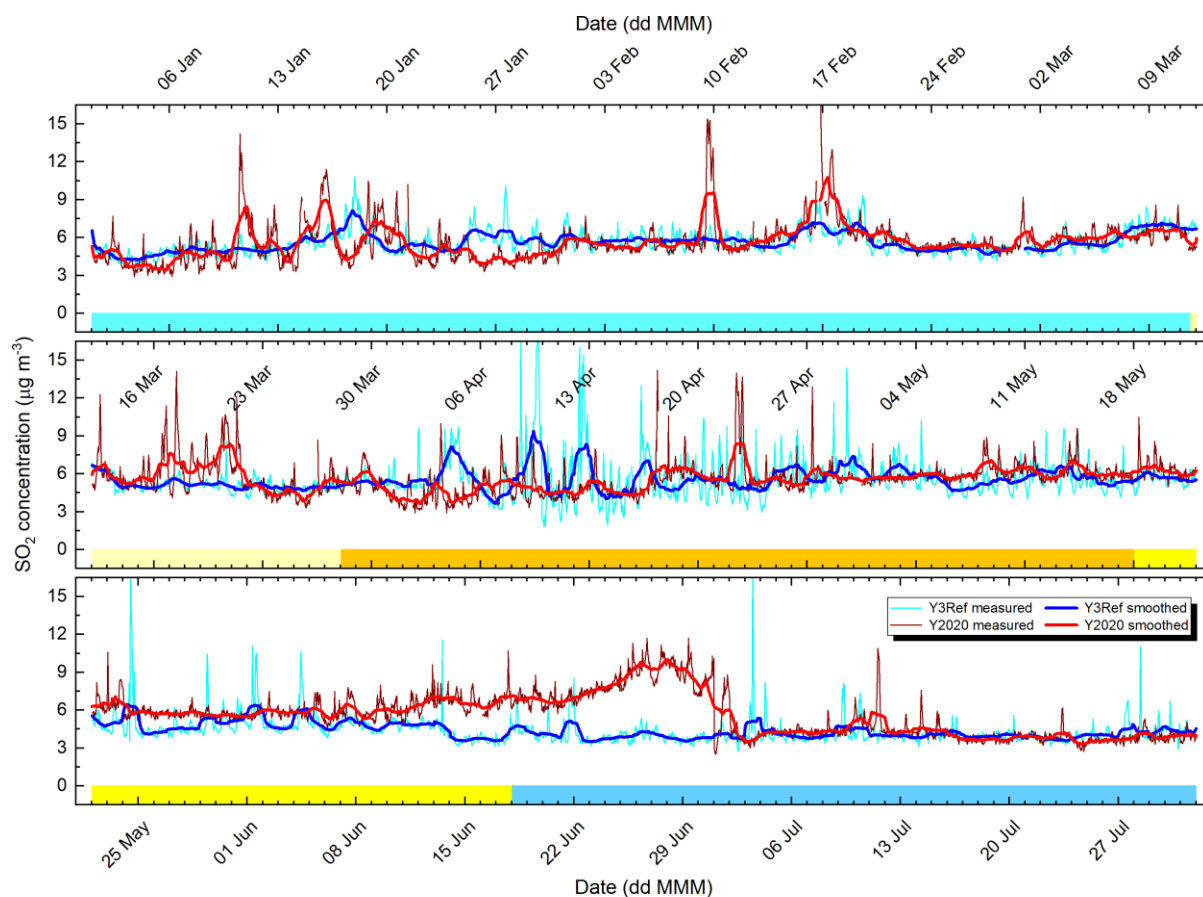

**Figure S8.** Time series of SO<sub>2</sub> concentration in the average reference year of 2017–2019 (Y3Ref) and year 2020 together with their 24-h smoothed curves over the five consecutive phases of the first COVID-19 outbreak. The phases are marked by the following colour codes: Pre-emergency phase lighter blue, Pre-restriction phase lighter yellow, Restriction phase orange, Post-restriction phase darker yellow and Post-emergency phase darker blue. The tick labels of the abscissa indicate the Mondays in 2020.

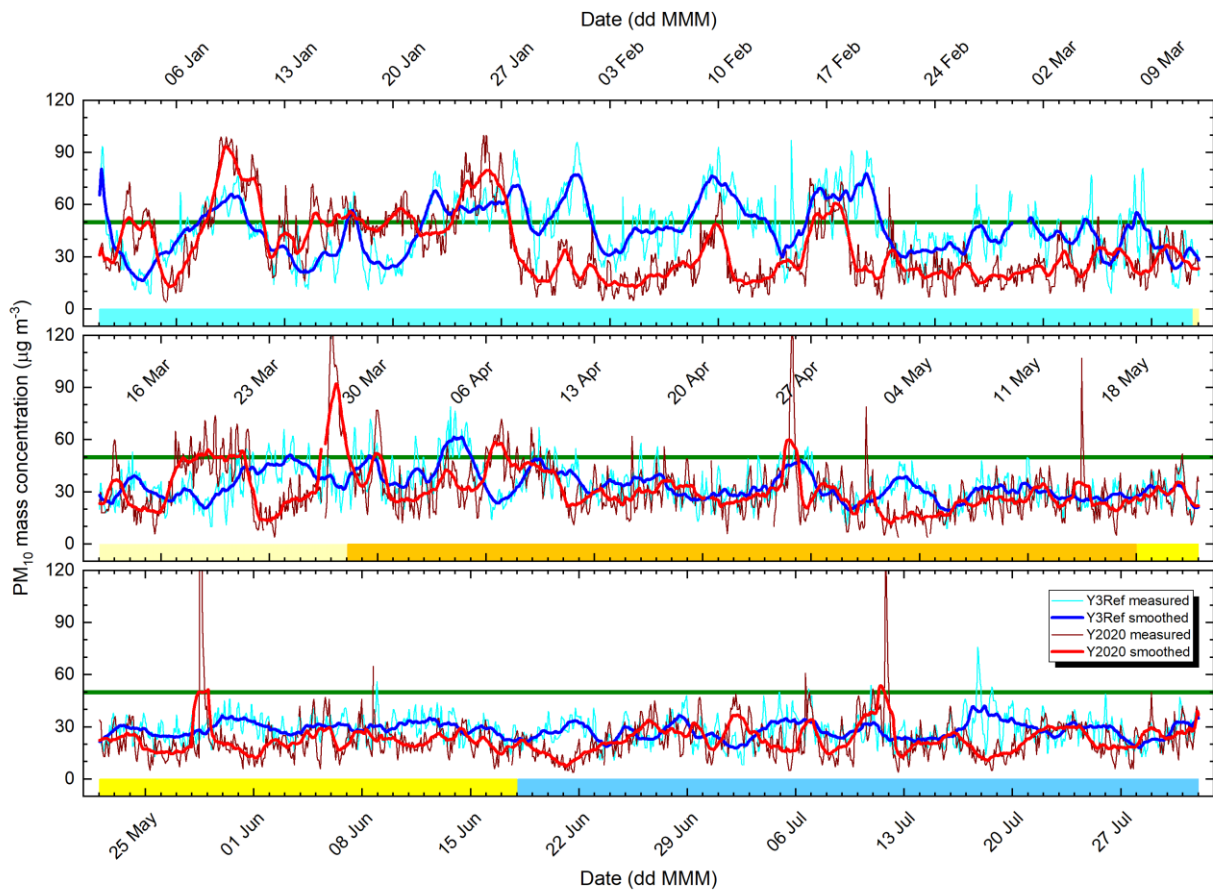

**Figure S9.** Time series of PM<sub>10</sub> mass concentration in the average reference year of 2017–2019 (Y3Ref) and year 2020 together with their 24-h smoothed curves over the five consecutive phases of the first COVID-19 outbreak. The phases are marked by the following colour codes: Pre-emergency phase lighter blue, Pre-restriction phase lighter yellow, Restriction phase orange, Post-restriction phase darker yellow and Post-emergency phase darker blue. The daily health limit of 50  $\mu\text{g m}^{-3}$  is indicated by a horizontal line in darker green colour. The tick labels of the abscissa indicate the Mondays in 2020.

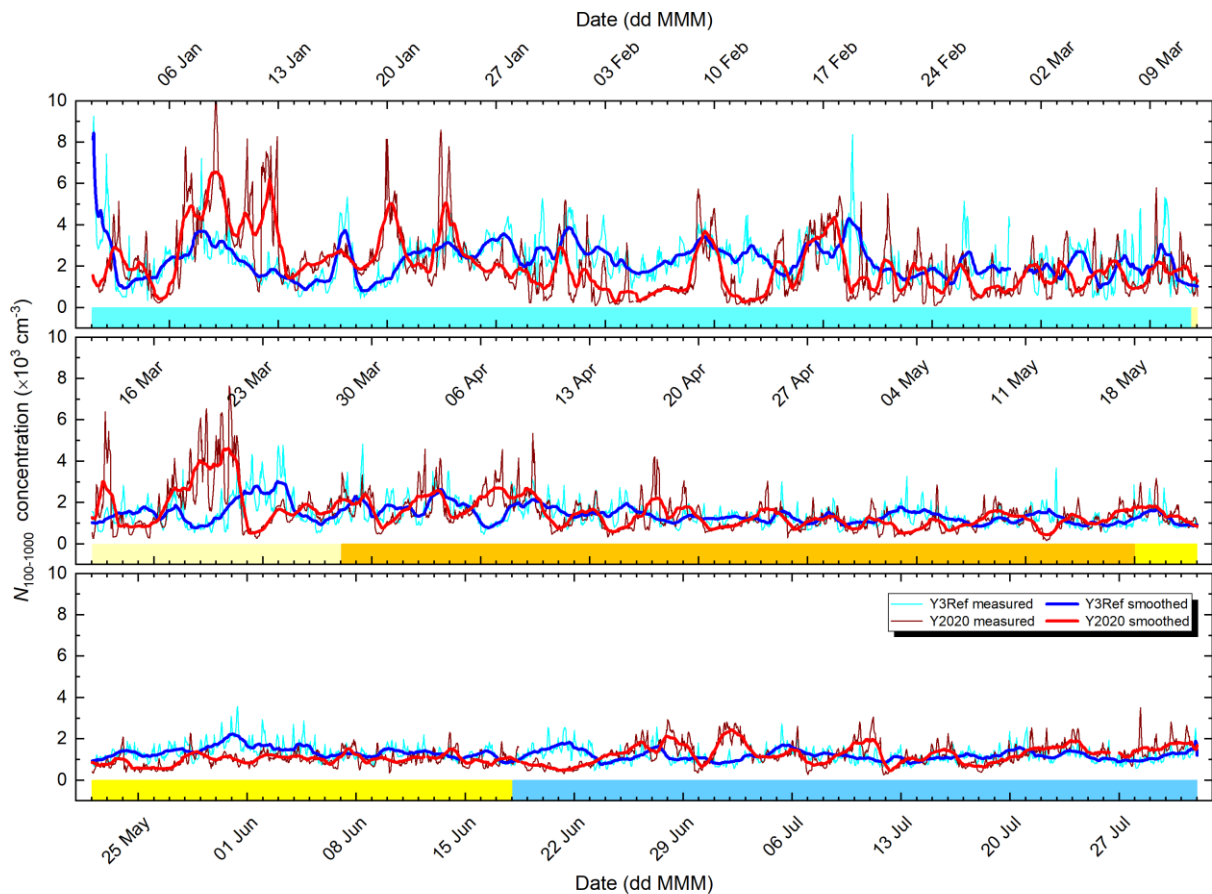

**Figure S10.** Time series of  $N_{100-1000}$  concentration in the average reference year of 2017–2019 (Y3Ref) and year 2020 together with their 24-h smoothed curves over the five consecutive phases of the first COVID-19 outbreak. The phases are marked by the following colour codes: Pre-emergency phase lighter blue, Pre-restriction phase lighter yellow, Restriction phase orange, Post-restriction phase darker yellow and Post-emergency phase darker blue. The tick labels of the abscissa indicate the Mondays in 2020.

## Reference

Maheras, P., Tolika, K., Tegoulas, I., Anagnostopoulou, Ch., Szpirosz, K., Károssy, Cs., Makra, L.: Comparison of an automated classification system with an empirical classification of circulation patterns over the Pannonian basin, Central Europe, Meteorol. Atmos. Phys., <https://doi.org/10.1007/s00703-018-0601-x>, 2018.
